# Supplementary material
Source: Copernicus journal article supplement (doi:10.5194/bg-23-4213-2026)
Supplement: Supplementary file 1 [file bg-23-4213-2026-supplement.pdf]

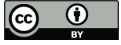

*Supplement of*

## **The mirabilite microbiocosm in a Carpathian contact cave**

**Oana Teodora Moldovan et al.**

*Correspondence to:* Oana Teodora Moldovan (oanamol35@gmail.com)

The copyright of individual parts of the supplement might differ from the article licence.

Supplementary material

**Table S1: The most abundant bacteria genera in Tausoare Cave samples. See Table 1 for abbreviations.**

| Genus                                | MTS1de | MTS2de | MOTSap | STS1ma | STS2ma | STS1se | STS2se | STS3Asc | WTS4ma | WTS4se | Lit_TS2ma | Lit_TS2se | Lit_TS3Asc | Lit_TS3Bse |
|--------------------------------------|--------|--------|--------|--------|--------|--------|--------|---------|--------|--------|-----------|-----------|------------|------------|
|                                      | c      | c      | r      | r      | r      | p      | p      | p       | r      | p      | r         | p         | p          | p          |
| <i>Pseudomonas</i>                   | 0.778  | 0.324  | 0.555  | 0.000  | 0.000  | 0.000  | 0.000  | 0.000   | 0.000  | 0.000  | 0.074     | 0.004     | 0.157      | 0.115      |
| <i>Lyso bacter</i>                   | 0.031  | 0.140  | 0.000  | 0.201  | 0.593  | 0.313  | 0.405  | 0.142   | 0.031  | 0.082  | 0.018     | 0.000     | 0.000      | 0.000      |
| <i>Rickettsia</i>                    | 0.000  | 0.000  | 0.000  | 0.000  | 0.000  | 0.000  | 0.000  | 0.000   | 0.000  | 0.000  | 0.280     | 0.172     | 0.010      | 0.389      |
| <i>NA-Longimicrobiaceae</i>          | 0.021  | 0.016  | 0.000  | 0.440  | 0.002  | 0.327  | 0.002  | 0.000   | 0.000  | 0.000  | 0.000     | 0.000     | 0.000      | 0.000      |
| <i>Paeniglutamicibacter</i>          | 0.001  | 0.030  | 0.000  | 0.000  | 0.000  | 0.000  | 0.000  | 0.000   | 0.000  | 0.000  | 0.009     | 0.112     | 0.371      | 0.022      |
| <i>NA-Actinomarinales</i>            | 0.057  | 0.028  | 0.000  | 0.020  | 0.020  | 0.064  | 0.076  | 0.026   | 0.000  | 0.000  | 0.000     | 0.000     | 0.000      | 0.000      |
| <i>Anseongella</i>                   | 0.000  | 0.014  | 0.000  | 0.006  | 0.004  | 0.061  | 0.093  | 0.109   | 0.000  | 0.000  | 0.000     | 0.000     | 0.000      | 0.000      |
| <i>Streptomyces</i>                  | 0.000  | 0.000  | 0.000  | 0.000  | 0.000  | 0.000  | 0.000  | 0.000   | 0.000  | 0.000  | 0.021     | 0.150     | 0.015      | 0.009      |
| <i>Pseudarthrobacter</i>             | 0.000  | 0.000  | 0.000  | 0.000  | 0.000  | 0.000  | 0.000  | 0.000   | 0.000  | 0.000  | 0.010     | 0.091     | 0.057      | 0.017      |
| <i>Arthrobacter</i>                  | 0.000  | 0.000  | 0.000  | 0.000  | 0.000  | 0.000  | 0.000  | 0.000   | 0.000  | 0.000  | 0.001     | 0.019     | 0.140      | 0.013      |
| <i>Flavobacterium</i>                | 0.000  | 0.000  | 0.000  | 0.000  | 0.000  | 0.000  | 0.000  | 0.000   | 0.006  | 0.151  | 0.002     | 0.000     | 0.000      | 0.013      |
| <i>Acinetobacter</i>                 | 0.000  | 0.000  | 0.000  | 0.009  | 0.003  | 0.000  | 0.015  | 0.013   | 0.023  | 0.007  | 0.086     | 0.001     | 0.000      | 0.002      |
| <i>Sporosarcina</i>                  | 0.000  | 0.000  | 0.000  | 0.000  | 0.000  | 0.000  | 0.000  | 0.000   | 0.000  | 0.000  | 0.003     | 0.032     | 0.114      | 0.003      |
| <i>Candidatus_Arthromitus</i>        | 0.000  | 0.000  | 0.000  | 0.000  | 0.000  | 0.000  | 0.000  | 0.000   | 0.000  | 0.000  | 0.000     | 0.016     | 0.000      | 0.126      |
| <i>Luteimonas</i>                    | 0.000  | 0.000  | 0.000  | 0.000  | 0.026  | 0.007  | 0.061  | 0.047   | 0.000  | 0.000  | 0.000     | 0.000     | 0.000      | 0.000      |
| <i>NA-Xanthomonadaceae</i>           | 0.000  | 0.000  | 0.000  | 0.007  | 0.022  | 0.091  | 0.003  | 0.003   | 0.000  | 0.000  | 0.000     | 0.000     | 0.000      | 0.000      |
| <i>NA</i>                            | 0.000  | 0.000  | 0.017  | 0.000  | 0.000  | 0.000  | 0.000  | 0.000   | 0.100  | 0.002  | 0.000     | 0.000     | 0.000      | 0.000      |
| <i>Acidovorax</i>                    | 0.000  | 0.000  | 0.000  | 0.000  | 0.000  | 0.000  | 0.000  | 0.000   | 0.004  | 0.095  | 0.000     | 0.000     | 0.000      | 0.000      |
| <i>NA-Flavobacteriaceae</i>          | 0.002  | 0.037  | 0.000  | 0.000  | 0.000  | 0.056  | 0.001  | 0.000   | 0.000  | 0.000  | 0.000     | 0.000     | 0.000      | 0.000      |
| <i>NA-Saccharimonadales</i>          | 0.000  | 0.000  | 0.040  | 0.007  | 0.004  | 0.000  | 0.031  | 0.000   | 0.013  | 0.001  | 0.000     | 0.000     | 0.000      | 0.000      |
| <i>Pelobium</i>                      | 0.000  | 0.000  | 0.000  | 0.000  | 0.001  | 0.000  | 0.038  | 0.055   | 0.000  | 0.000  | 0.000     | 0.000     | 0.000      | 0.000      |
| <i>Blastocatella</i>                 | 0.000  | 0.000  | 0.000  | 0.000  | 0.000  | 0.000  | 0.014  | 0.072   | 0.000  | 0.000  | 0.000     | 0.000     | 0.000      | 0.000      |
| <i>Sphingopyxis</i>                  | 0.000  | 0.000  | 0.000  | 0.000  | 0.000  | 0.000  | 0.000  | 0.000   | 0.000  | 0.083  | 0.000     | 0.000     | 0.000      | 0.000      |
| <i>Alkanindiges</i>                  | 0.000  | 0.000  | 0.000  | 0.000  | 0.000  | 0.000  | 0.000  | 0.000   | 0.018  | 0.062  | 0.000     | 0.000     | 0.000      | 0.000      |
| <i>Rhodoferrax</i>                   | 0.000  | 0.000  | 0.000  | 0.000  | 0.000  | 0.000  | 0.000  | 0.000   | 0.001  | 0.074  | 0.000     | 0.000     | 0.000      | 0.000      |
| <i>Staphylococcus</i>                | 0.000  | 0.000  | 0.000  | 0.010  | 0.003  | 0.000  | 0.003  | 0.004   | 0.008  | 0.003  | 0.041     | 0.000     | 0.000      | 0.001      |
| <i>Sphingomonas</i>                  | 0.000  | 0.000  | 0.000  | 0.012  | 0.028  | 0.002  | 0.010  | 0.008   | 0.000  | 0.000  | 0.011     | 0.000     | 0.000      | 0.002      |
| <i>Enterococcus</i>                  | 0.000  | 0.000  | 0.000  | 0.000  | 0.000  | 0.000  | 0.000  | 0.000   | 0.000  | 0.000  | 0.003     | 0.068     | 0.000      | 0.001      |
| <i>Sphingobacterium</i>              | 0.000  | 0.000  | 0.000  | 0.000  | 0.000  | 0.000  | 0.000  | 0.000   | 0.000  | 0.000  | 0.039     | 0.025     | 0.000      | 0.000      |
| <i>Serratia</i>                      | 0.000  | 0.000  | 0.000  | 0.000  | 0.035  | 0.000  | 0.000  | 0.000   | 0.000  | 0.000  | 0.000     | 0.004     | 0.001      | 0.020      |
| <i>Cutibacterium</i>                 | 0.000  | 0.000  | 0.000  | 0.004  | 0.003  | 0.001  | 0.001  | 0.014   | 0.000  | 0.000  | 0.033     | 0.000     | 0.000      | 0.001      |
| <i>Brevundimonas</i>                 | 0.000  | 0.000  | 0.000  | 0.000  | 0.000  | 0.000  | 0.000  | 0.000   | 0.000  | 0.057  | 0.000     | 0.000     | 0.000      | 0.000      |
| <i>NA-S0134_terrestrial_group</i>    | 0.000  | 0.000  | 0.000  | 0.027  | 0.010  | 0.008  | 0.009  | 0.001   | 0.000  | 0.000  | 0.000     | 0.000     | 0.000      | 0.000      |
| <i>Rhodococcus</i>                   | 0.000  | 0.000  | 0.000  | 0.000  | 0.000  | 0.000  | 0.000  | 0.000   | 0.000  | 0.000  | 0.006     | 0.003     | 0.002      | 0.043      |
| <i>NA-Methyloligellaceae</i>         | 0.007  | 0.008  | 0.000  | 0.005  | 0.001  | 0.002  | 0.007  | 0.001   | 0.022  | 0.001  | 0.000     | 0.000     | 0.000      | 0.000      |
| <i>NA-Vicinamibacterales</i>         | 0.000  | 0.000  | 0.000  | 0.000  | 0.012  | 0.000  | 0.025  | 0.003   | 0.010  | 0.002  | 0.000     | 0.000     | 0.000      | 0.000      |
| <i>Lellotia</i>                      | 0.000  | 0.000  | 0.000  | 0.000  | 0.000  | 0.000  | 0.000  | 0.000   | 0.000  | 0.000  | 0.000     | 0.000     | 0.048      | 0.000      |
| <i>Streptococcus</i>                 | 0.000  | 0.000  | 0.000  | 0.017  | 0.005  | 0.000  | 0.001  | 0.000   | 0.010  | 0.001  | 0.014     | 0.000     | 0.000      | 0.000      |
| <i>Hydrogenophaga</i>                | 0.000  | 0.000  | 0.000  | 0.000  | 0.000  | 0.000  | 0.000  | 0.000   | 0.016  | 0.032  | 0.000     | 0.000     | 0.000      | 0.000      |
| <i>NA-Gitt-GS-136</i>                | 0.000  | 0.000  | 0.000  | 0.000  | 0.001  | 0.000  | 0.021  | 0.022   | 0.000  | 0.000  | 0.000     | 0.000     | 0.000      | 0.000      |
| <i>Chryseobacterium</i>              | 0.000  | 0.000  | 0.000  | 0.000  | 0.000  | 0.000  | 0.000  | 0.000   | 0.042  | 0.000  | 0.000     | 0.000     | 0.000      | 0.000      |
| <i>Qipengyuania</i>                  | 0.000  | 0.000  | 0.000  | 0.000  | 0.007  | 0.000  | 0.018  | 0.016   | 0.000  | 0.000  | 0.000     | 0.000     | 0.000      | 0.000      |
| <i>NA-Saccharimonadales-WWH38</i>    | 0.000  | 0.000  | 0.041  | 0.000  | 0.000  | 0.000  | 0.000  | 0.000   | 0.000  | 0.000  | 0.000     | 0.000     | 0.000      | 0.000      |
| <i>Bacillus</i>                      | 0.000  | 0.000  | 0.000  | 0.025  | 0.003  | 0.000  | 0.000  | 0.000   | 0.010  | 0.001  | 0.000     | 0.000     | 0.000      | 0.000      |
| <i>Delftia</i>                       | 0.000  | 0.000  | 0.000  | 0.015  | 0.024  | 0.000  | 0.000  | 0.000   | 0.000  | 0.000  | 0.000     | 0.000     | 0.000      | 0.000      |
| <i>wb1-F19</i>                       | 0.000  | 0.000  | 0.000  | 0.000  | 0.000  | 0.000  | 0.000  | 0.000   | 0.026  | 0.000  | 0.006     | 0.005     | 0.000      | 0.001      |
| <i>Clostridium s.str.1</i>           | 0.000  | 0.000  | 0.000  | 0.000  | 0.000  | 0.000  | 0.000  | 0.000   | 0.000  | 0.000  | 0.002     | 0.007     | 0.002      | 0.025      |
| <i>Lachnoclostridium</i>             | 0.000  | 0.000  | 0.000  | 0.000  | 0.000  | 0.000  | 0.000  | 0.000   | 0.000  | 0.000  | 0.000     | 0.034     | 0.000      | 0.000      |
| <i>Enhydrobacter</i>                 | 0.000  | 0.000  | 0.000  | 0.000  | 0.000  | 0.000  | 0.000  | 0.000   | 0.006  | 0.011  | 0.017     | 0.000     | 0.000      | 0.000      |
| <i>Sphingorhabdus</i>                | 0.000  | 0.000  | 0.011  | 0.001  | 0.003  | 0.019  | 0.000  | 0.000   | 0.000  | 0.000  | 0.000     | 0.000     | 0.000      | 0.000      |
| <i>NA-Gammaproteobacteria-PLTA13</i> | 0.000  | 0.000  | 0.000  | 0.000  | 0.000  | 0.000  | 0.000  | 0.000   | 0.030  | 0.002  | 0.000     | 0.000     | 0.000      | 0.000      |
| <i>Carnobacterium</i>                | 0.000  | 0.000  | 0.000  | 0.000  | 0.000  | 0.000  | 0.000  | 0.000   | 0.000  | 0.000  | 0.001     | 0.001     | 0.002      | 0.027      |
| <i>Stenotrophomonas</i>              | 0.000  | 0.000  | 0.000  | 0.000  | 0.000  | 0.000  | 0.000  | 0.000   | 0.031  | 0.000  | 0.000     | 0.000     | 0.000      | 0.000      |
| <i>Microbulbifer</i>                 | 0.000  | 0.000  | 0.000  | 0.000  | 0.006  | 0.000  | 0.022  | 0.003   | 0.000  | 0.000  | 0.000     | 0.000     | 0.000      | 0.000      |
| <i>Aquabacterium</i>                 | 0.000  | 0.000  | 0.000  | 0.000  | 0.000  | 0.000  | 0.000  | 0.000   | 0.000  | 0.029  | 0.000     | 0.000     | 0.000      | 0.000      |
| <i>Subgroup_10</i>                   | 0.000  | 0.000  | 0.000  | 0.000  | 0.002  | 0.000  | 0.016  | 0.011   | 0.000  | 0.000  | 0.000     | 0.000     | 0.000      | 0.000      |
| <i>NA-Bacillaceae</i>                | 0.000  | 0.000  | 0.000  | 0.000  | 0.000  | 0.000  | 0.000  | 0.000   | 0.000  | 0.000  | 0.002     | 0.023     | 0.000      | 0.004      |
| <i>NA-Cand_Woesebacteria</i>         | 0.000  | 0.000  | 0.028  | 0.000  | 0.000  | 0.000  | 0.000  | 0.000   | 0.000  | 0.000  | 0.000     | 0.000     | 0.000      | 0.000      |
| <i>NA-Vermiphilaceae</i>             | 0.000  | 0.000  | 0.028  | 0.000  | 0.000  | 0.000  | 0.000  | 0.000   | 0.000  | 0.000  | 0.000     | 0.000     | 0.000      | 0.000      |
| <i>NA-Berkeibacteria</i>             | 0.000  | 0.000  | 0.027  | 0.000  | 0.000  | 0.000  | 0.000  | 0.000   | 0.000  | 0.000  | 0.000     | 0.000     | 0.000      | 0.000      |
| <i>Corynebacterium</i>               | 0.000  | 0.000  | 0.000  | 0.000  | 0.000  | 0.000  | 0.000  | 0.000   | 0.013  | 0.000  | 0.011     | 0.001     | 0.000      | 0.001      |
| <i>Lactococcus</i>                   | 0.000  | 0.000  | 0.000  | 0.000  | 0.000  | 0.000  | 0.000  | 0.000   | 0.000  | 0.000  | 0.000     | 0.023     | 0.001      | 0.001      |
| <i>NA-Streptosporangiaceae</i>       | 0.000  | 0.000  | 0.000  | 0.000  | 0.000  | 0.000  | 0.000  | 0.000   | 0.000  | 0.000  | 0.021     | 0.001     | 0.000      | 0.000      |
| <i>NA-Ruminococcaceae</i>            | 0.000  | 0.000  | 0.000  | 0.000  | 0.000  | 0.000  | 0.000  | 0.000   | 0.000  | 0.000  | 0.000     | 0.022     | 0.000      | 0.000      |

|                                      |       |       |       |       |       |       |       |       |       |       |       |       |       |       |
|--------------------------------------|-------|-------|-------|-------|-------|-------|-------|-------|-------|-------|-------|-------|-------|-------|
| <i>Buttiauxella</i>                  | 0.000 | 0.000 | 0.000 | 0.000 | 0.000 | 0.000 | 0.000 | 0.000 | 0.000 | 0.000 | 0.000 | 0.000 | 0.019 | 0.003 |
| <i>MND1</i>                          | 0.000 | 0.000 | 0.011 | 0.000 | 0.000 | 0.000 | 0.000 | 0.000 | 0.008 | 0.002 | 0.000 | 0.000 | 0.000 | 0.000 |
| <i>NA-Moraxellaceae</i>              | 0.000 | 0.000 | 0.000 | 0.000 | 0.000 | 0.000 | 0.000 | 0.000 | 0.001 | 0.018 | 0.000 | 0.000 | 0.000 | 0.000 |
| <i>Undibacterium</i>                 | 0.000 | 0.000 | 0.000 | 0.000 | 0.000 | 0.000 | 0.000 | 0.000 | 0.001 | 0.017 | 0.000 | 0.000 | 0.000 | 0.000 |
| <i>Flavivibrio</i>                   | 0.000 | 0.000 | 0.000 | 0.000 | 0.000 | 0.000 | 0.000 | 0.000 | 0.000 | 0.017 | 0.000 | 0.000 | 0.000 | 0.000 |
| <i>Gaiella</i>                       | 0.000 | 0.000 | 0.000 | 0.000 | 0.000 | 0.000 | 0.000 | 0.000 | 0.013 | 0.004 | 0.000 | 0.000 | 0.000 | 0.000 |
| <i>Nitrospira</i>                    | 0.000 | 0.000 | 0.000 | 0.000 | 0.000 | 0.000 | 0.000 | 0.000 | 0.010 | 0.006 | 0.000 | 0.000 | 0.000 | 0.000 |
| <i>Achromobacter</i>                 | 0.000 | 0.000 | 0.000 | 0.000 | 0.000 | 0.000 | 0.000 | 0.000 | 0.016 | 0.000 | 0.000 | 0.000 | 0.000 | 0.000 |
| <i>NA-Saccharimonadales LWQ8</i>     | 0.000 | 0.000 | 0.015 | 0.000 | 0.000 | 0.000 | 0.000 | 0.000 | 0.000 | 0.000 | 0.000 | 0.000 | 0.000 | 0.000 |
| <i>NA-Microbacteriaceae</i>          | 0.000 | 0.000 | 0.000 | 0.000 | 0.000 | 0.000 | 0.000 | 0.000 | 0.000 | 0.000 | 0.000 | 0.001 | 0.002 | 0.013 |
| <i>NA-Actinobacteriota MB-A2-108</i> | 0.000 | 0.000 | 0.000 | 0.000 | 0.000 | 0.000 | 0.000 | 0.000 | 0.012 | 0.003 | 0.000 | 0.000 | 0.000 | 0.000 |
| <i>NA-Acidimicrobia IMCC26256</i>    | 0.000 | 0.000 | 0.015 | 0.000 | 0.000 | 0.000 | 0.000 | 0.000 | 0.000 | 0.000 | 0.000 | 0.000 | 0.000 | 0.000 |
| <i>NA-Patescibacteria WWE3</i>       | 0.000 | 0.000 | 0.014 | 0.000 | 0.000 | 0.000 | 0.000 | 0.000 | 0.000 | 0.000 | 0.000 | 0.000 | 0.000 | 0.000 |
| <i>NA-cvE6</i>                       | 0.000 | 0.000 | 0.014 | 0.000 | 0.000 | 0.000 | 0.000 | 0.000 | 0.000 | 0.000 | 0.000 | 0.000 | 0.000 | 0.000 |
| <i>Phaeocystidibacter</i>            | 0.001 | 0.013 | 0.000 | 0.000 | 0.000 | 0.000 | 0.000 | 0.000 | 0.000 | 0.000 | 0.000 | 0.000 | 0.000 | 0.000 |
| <i>Aquicella</i>                     | 0.000 | 0.000 | 0.000 | 0.000 | 0.000 | 0.000 | 0.000 | 0.000 | 0.013 | 0.000 | 0.000 | 0.000 | 0.000 | 0.000 |
| <i>Raoultibacter</i>                 | 0.000 | 0.000 | 0.000 | 0.000 | 0.000 | 0.000 | 0.000 | 0.000 | 0.000 | 0.000 | 0.000 | 0.013 | 0.000 | 0.000 |
| <i>Cand. Ovatusbacter</i>            | 0.000 | 0.000 | 0.013 | 0.000 | 0.000 | 0.000 | 0.000 | 0.000 | 0.000 | 0.000 | 0.000 | 0.000 | 0.000 | 0.000 |
| <i>Massilia</i>                      | 0.000 | 0.000 | 0.000 | 0.001 | 0.001 | 0.000 | 0.011 | 0.000 | 0.000 | 0.000 | 0.000 | 0.000 | 0.000 | 0.000 |
| <i>Chlamydia</i>                     | 0.000 | 0.000 | 0.000 | 0.000 | 0.000 | 0.000 | 0.000 | 0.000 | 0.000 | 0.000 | 0.000 | 0.013 | 0.000 | 0.000 |
| <i>Micrococcus</i>                   | 0.000 | 0.000 | 0.000 | 0.000 | 0.000 | 0.000 | 0.000 | 0.000 | 0.000 | 0.000 | 0.012 | 0.000 | 0.000 | 0.000 |
| <i>Woeseia</i>                       | 0.001 | 0.011 | 0.000 | 0.000 | 0.000 | 0.000 | 0.000 | 0.000 | 0.000 | 0.000 | 0.000 | 0.000 | 0.000 | 0.000 |
| <i>Parabacteroides</i>               | 0.000 | 0.000 | 0.000 | 0.000 | 0.000 | 0.000 | 0.000 | 0.000 | 0.000 | 0.000 | 0.000 | 0.012 | 0.000 | 0.000 |
| <i>NA-Intrasporangiaceae</i>         | 0.000 | 0.000 | 0.000 | 0.000 | 0.000 | 0.000 | 0.000 | 0.000 | 0.000 | 0.000 | 0.011 | 0.000 | 0.000 | 0.001 |
| <i>Fronthabitus</i>                  | 0.000 | 0.000 | 0.000 | 0.000 | 0.000 | 0.000 | 0.000 | 0.000 | 0.000 | 0.000 | 0.000 | 0.000 | 0.001 | 0.010 |
| <i>NA-Gaiellales</i>                 | 0.000 | 0.000 | 0.000 | 0.000 | 0.000 | 0.000 | 0.000 | 0.000 | 0.010 | 0.002 | 0.000 | 0.000 | 0.000 | 0.000 |
| <i>NA-Parcubacteria GWA2-38-13b</i>  | 0.000 | 0.000 | 0.000 | 0.000 | 0.000 | 0.000 | 0.000 | 0.000 | 0.010 | 0.000 | 0.000 | 0.000 | 0.000 | 0.000 |

**Table S2: The physicochemical characteristics of the analysed samples in Tausoare Cave. See Table 1 for abbreviations.**

| UM    | Element                                     | STS1mar | STS2mar | STS1sep | STS2sep | STS3Asep | STS3Bsep | MTS1dec | MTS2dec | MOTSmay | UM    | WTS4mar | WTS4sep |
|-------|---------------------------------------------|---------|---------|---------|---------|----------|----------|---------|---------|---------|-------|---------|---------|
|       | pH                                          | 8.1     | 8.3     | 8.4     | 8.4     | 8.2      | 8.7      | 8.6     | 9.8     | 8.6     |       | 7.8     | 9.0     |
| uS/cm | EC                                          | 3260    | 1944    | 3111    | 1369    | 2052     | 6430     | 10356   | 59553   | 121     | uS/cm | 104.0   | 115     |
| mg/kg | S                                           | 4217    | 2099    | 9887    | 1444    | 3315     | 84       | 8548    | 44399   | 216     | mg/L  | 2.6     | 1.84    |
| mg/kg | Water soluble SO <sub>4</sub> <sup>2-</sup> | 12633   | 4188    | 22113   | 4314    | 9883     | 240.0    | 24578   | 126940  | 646     | NA    | NA      | NA      |
| mg/kg | Water soluble S                             | 4211    | 1959    | 9371    | 1438    | 3294     | 80       | 8193    | 42313   | 215     | NA    | NA      | NA      |
| mg/kg | Na                                          | 1667    | 790     | 3660    | 933     | 913      | 480      | 14724   | 27162   | 77      | mg/L  | 1.4     | 1.54    |
| mg/kg | Mg                                          | 2305    | 2020    | 7390    | 6003    | 5553     | 6087     | 2028    | 1113    | 814     | mg/L  | 1.1     | 1.09    |
| mg/kg | K                                           | 3500    | 3029    | 2007    | 1973    | 2437     | 2697     | 3190    | 1209    | 512     | mg/L  | 1.0     | 1.068   |
| mg/kg | Ca                                          | 49833   | 35333   | 74567   | 73533   | 49267    | 49130    | 15630   | 17353   | 335400  | mg/L  | 18.6    | 21.19   |
| mg/kg | Al                                          | 10947   | 9833    | 8363    | 10223   | 11383    | 12140    | 13586   | 2491    | 2042    | mg/L  | 0.0     | 0.06    |
| mg/kg | Fe                                          | 8093    | 8107    | 14110   | 22053   | 22773    | 27687    | 26245   | 1732    | 730     | mg/L  | 0.0     | 0       |
| mg/kg | P                                           | 784.3   | 503.0   | 542.3   | 442.3   | 1181.0   | 283.6    | 393     | 117     | 326     | mg/L  | 0.0     | 0       |
| mg/kg | V                                           | 32.0    | 31.6    | 14.6    | 20.8    | 24.4     | 34.2     | 34.0    | 1.8     | 3.3     | mg/L  | 1.1     | 1.5     |
| mg/kg | Cr                                          | 34.3    | 28.3    | 12.1    | 17.4    | 19.0     | 23.8     | 37.7    | 3.1     | 7.2     | mg/L  | 0.6     | 1.26    |
| mg/kg | Mn                                          | 237.9   | 298.6   | 84.4    | 222.0   | 206.7    | 209.3    | 448.7   | 36.5    | 140.0   | mg/L  | 0.0     | 0.00    |
| mg/kg | Co                                          | 7.7     | 8.2     | 2.6     | 5.0     | 4.7      | 6.6      | 6.0     | 0.8     | 0.9     | mg/L  | 0.0     | 0.10    |
| mg/kg | Ni                                          | 24.8    | 24.1    | 14.7    | 17.7    | 18.0     | 19.1     | 27.8    | 3.4     | 19.6    | mg/L  | 0.0     | 1.89    |
| mg/kg | Cu                                          | 18.9    | 17.0    | 5.1     | 8.3     | 9.6      | 9.6      | 183.7   | 2.1     | 3.3     | mg/L  | 0.0     | 4.27    |
| mg/kg | Zn                                          | 84.0    | 76.9    | 11.4    | 21.1    | 38.4     | 34.7     | 50.9    | 8.6     | 5.4     | mg/L  | 0.3     | 8.59    |
| mg/kg | Cd                                          | 0.29    | 0.30    | 0.10    | 0.16    | 0.21     | 0.18     | 0.2     | 0.3     | 0.6     | mg/L  | 0.2     | 0.22    |
| mg/kg | Pb                                          | 6.4     | 8.6     | 2.17    | 5.20    | 7.33     | 8.07     | 6.9     | 0.8     | 1.5     | mg/L  | 0.1     | 1.2     |

**Table S3: Mineralogical composition of the samples based on XRD analysis.**

| Mineral group | Mineral species | Chemical formula                                    | Mineral abundance* |         |         |         |          |          |         |         |         |  |
|---------------|-----------------|-----------------------------------------------------|--------------------|---------|---------|---------|----------|----------|---------|---------|---------|--|
|               |                 |                                                     | STS1mar            | STS2mar | STS1sep | STS2sep | STS3Asep | STS3Bsep | MTS1dec | MTS2dec | MOTSapr |  |
| Carbonates    | Calcite         | CaCO <sub>3</sub>                                   | +                  | +       | +       | +       | +        | ±        | ±       | ±       | ++      |  |
| Oxides        | Quartz          | SiO <sub>2</sub>                                    | ++                 | ++      | ++      | ++      | ++       | ++       | ++      | +       | -       |  |
| Silicates     | Albite          | NaAlSi <sub>3</sub> O <sub>8</sub>                  | ++                 | ++      | ++      | ++      | ++       | ++       | +       | ++      | -       |  |
|               | Orthoclase      | KAlSi <sub>3</sub> O <sub>8</sub>                   | +                  | +       | ++      | +       | -        | ±        | -       | +       | -       |  |
| Sulfates      | Thenardite      | Na <sub>2</sub> SO <sub>4</sub>                     | ±                  | ±       | -       | -       | -        | -        | ±       | ++      | -       |  |
|               | Gypsum          | CaSO <sub>4</sub> ·2H <sub>2</sub> O                | -                  | -       | -       | -       | -        | -        | ±       | -       | -       |  |
|               | Bassanite       | CaSO <sub>4</sub> ·0.5H <sub>2</sub> O              | -                  | -       | +       | -       | ±        | -        | -       | -       | -       |  |
|               | Mirabilite      | Na <sub>2</sub> SO <sub>4</sub> ·10H <sub>2</sub> O | -                  | -       | ±       | ±       | ±        | ±        | -       | -       | -       |  |

\* ++ Major species (20–50%); + Minor species (5–20%); ± Trace species (<5%).

### FTIR and XRD analysis

The FTIR spectrum of the MTS2dec mirabilite sample (Figure S2a) was characterized by strong absorption bands at  $1088\text{ cm}^{-1}$  and  $608\text{ cm}^{-1}$ , corresponding to the asymmetric stretching and bending vibrations of  $\text{SO}_4^{2-}$ , respectively. In addition, low-intensity bands at  $\sim 1433$  and  $\sim 870\text{ cm}^{-1}$ , attributed to  $\text{CO}_3^{2-}$ , indicated the presence of minor carbonate phases. These suggested a sulfate-dominated mineral accompanied by traces of carbonates. The FTIR data agreed with XRD data that identified thenardite as main phase, accompanied by silicates (albite, orthoclase), quartz and traces of calcite. The FTIR spectrum of MTS1dec mirabilite sample exhibited similar bands to those observed in MTS2dec, but the specific bands for sulphate were less intense, whereas those of carbonate were more intense. A slight shift in peaks positions was observed, along with a large band at  $994\text{ cm}^{-1}$ , likely resulting from the overlap of  $\text{SO}_4^{2-}$  and  $\text{CO}_3^{2-}$  vibrations with Si–O–Si stretching modes, probably associated with quartz. The XRD data of MTS1dec confirmed quartz as the dominant phase accompanied by albite, calcite, gypsum and traces of thenardite. This is consistent with the lower concentration of soluble S measured in this sample.

The FTIR spectra of the sediments (Figure S2b) showed a similar mineralogical composition. All spectra were dominated by an intense band at  $\sim 1000\text{ cm}^{-1}$  attributed to overlapping of Si–O–Si asymmetric stretching vibrations probably in quartz ( $1080\text{--}1100\text{ cm}^{-1}$ ) with that of carbonate and sulphate groups. The bands at  $\sim 1420\text{ cm}^{-1}$  attributed to asymmetric stretching ( $\nu_3$ ) and  $\sim 870$  out-of-plane bending ( $\nu_2$ ) of  $\text{CO}_3^{2-}$  were more intense in sediments collected in STS1 and STS2 both in March and September compared to those from STS3, suggesting relatively higher calcite contents in STS1 and STS2. This finding was in line with XRD data that indicated that calcite occurs as a minor phase in all sediments. The XRD data further showed that quartz and silicate minerals were the predominant crystalline phase in the sediments. Calcite was a minor phase in all sediment samples. In both sediment samples collected in March (STS1mar and STS2mar) traces of thenardite were identified whereas in all samples collected in September traces of mirabilite were identified.

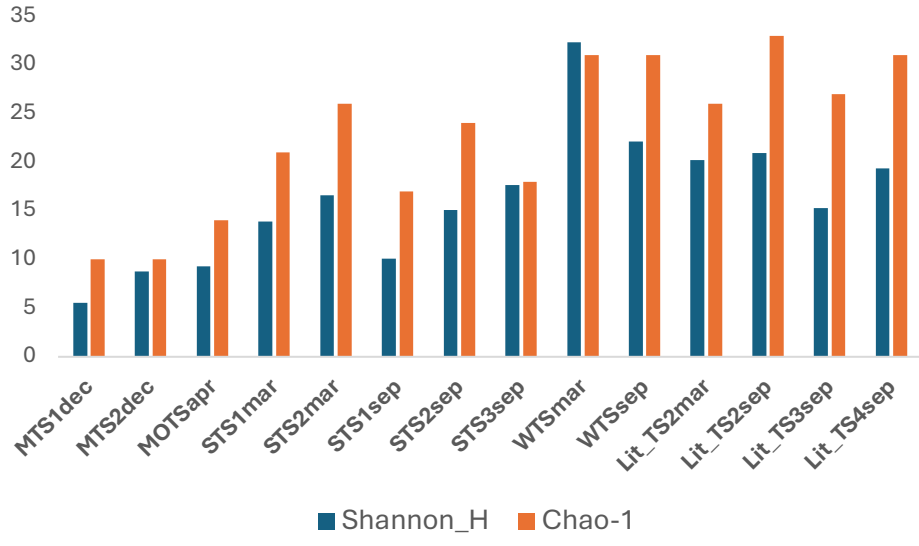

**Figure S1: Diversity indices for the analysed samples.** See Table 1 for abbreviations.

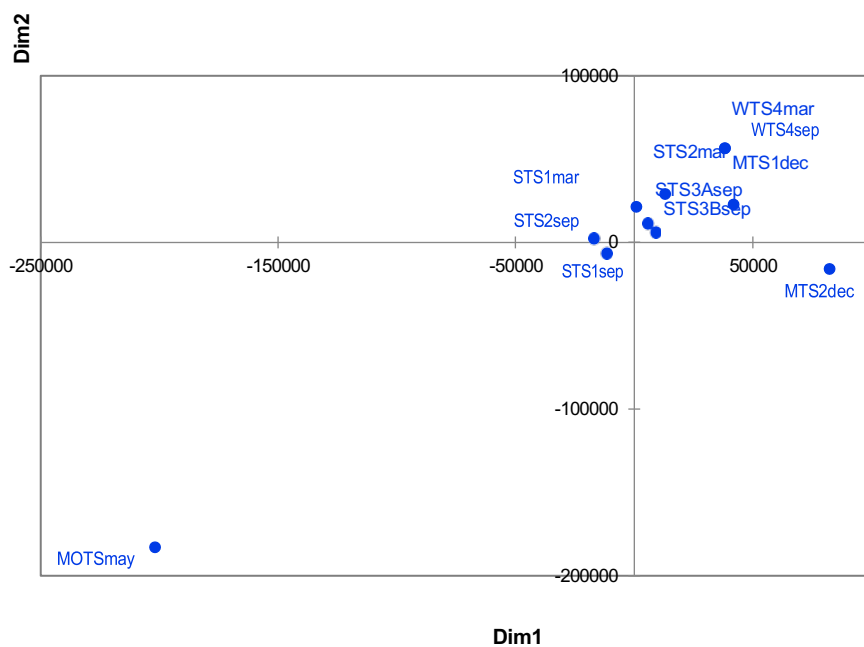

**Figure S2: Two-dimensional MDS plot on the elemental concentration of mirabilite, moonmilk, water and sediment samples.** Kruskal's stress (1) = 0.025 indicates the significance of dissimilarity between samples. See Table 1 for abbreviations and Table S2 for values.

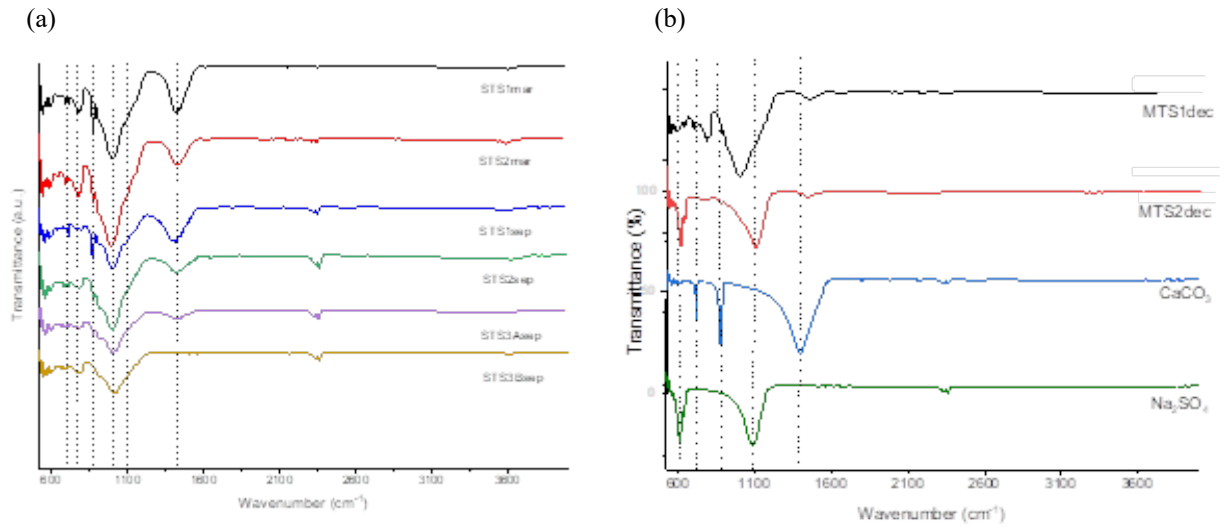

**Figure S3: Fourier-transform infrared spectra of a) mirabilite, CaCO<sub>3</sub> and Na<sub>2</sub>SO<sub>4</sub> and b) sediment samples.**
